# Supplementary material
Source: PubMed Central journal article supplement (PMC6549122)
Supplement: EMBR-20-e47283-s001.pdf [file EMBR-20-e47283-s001.pdf]

**Appendix for:** The nucleoporin ELYS regulates nuclear size by controlling NPC number and nuclear import capacity  
Predrag Jevtić, Andria C. Schibler, Chase C. Wesley, Gianluca Pegoraro, Tom Misteli, Daniel L. Levy

**Table of Contents**

|          |      |
|----------|------|
| Table S1 | Pg 2 |
| Table S2 | Pg 3 |

**Table S1:** Gene knockdowns that reduced nuclear size in MCF-10AT1k.cl2 cells.

| <b>Gene</b> | <b>max. z-score</b> | <b>SEM</b> | <b>Gene</b> | <b>median z-score</b> | <b>SEM</b> |
|-------------|---------------------|------------|-------------|-----------------------|------------|
| SMARCC2     | -3.48               | 0.8355     | SEC13       | -2.65                 | 0.2245     |
| RAI1        | -3.26               | 0.2055     | SHPRH       | -2.53                 | 0.3855     |
| ITGAX       | -3.23               | 0.3475     | FZR1        | -2.37                 | 0.3525     |
| RAC1        | -3.07               | 0.1270     | SMARCC2     | -2.29                 | 0.2225     |
| SEC13       | -2.97               | 0.2000     | RAC1        | -1.98                 | 0.2825     |
| SHPRH       | -2.70               | 0.8340     | AHCTF1      | -1.97                 | 0.1560     |
| AHCTF1      | -2.47               | 0.2415     | NCAPD2      | -1.94                 | 0.3815     |
| FZR1        | -2.42               | 0.0930     | ATXN7L3     | -1.82                 | 0.4360     |
| ATXN7L3     | -2.32               | 0.0665     | ITGAX       | -1.75                 | 0.1370     |
| CMTM5       | -2.24               | 0.3475     | SUN3        | -1.75                 | 0.3610     |
| HAT1        | -2.13               | 0.1345     | WDR61       | -1.67                 | 0.1330     |
| NCAPD2      | -1.98               | 0.1145     | RAI1        | -1.63                 | 0.4070     |
| TADA3       | -1.97               | 0.2560     | UBE2E1      | -1.62                 | 0.0735     |
| SUPT16H     | -1.90               | 0.2460     | CREBBP      | -1.61                 | 0.3660     |
| WDR61       | -1.88               | 0.0195     | BMI1        | -1.58                 | 0.5715     |
| BMI1        | -1.82               | 0.2505     | HAT1        | -1.57                 | 0.2110     |
| SUN3        | -1.76               | 0.2490     | CMTM5       | -1.55                 | 0.1830     |
| CREBBP      | -1.70               | 0.7185     | TADA3       | -1.54                 | 0.2760     |
| UBE2E1      | -1.67               | 0.0090     | SUPT16H     | -1.51                 | 0.2575     |

Z-scores were calculated for three different siRNA oligo sequences for each gene and two biological replicates.

**Table S2:** Function of hits that reduced nuclear size in MCF-10AT1k.cl2 cells.

| <b>Gene</b>    | <b>Function</b>                                       |
|----------------|-------------------------------------------------------|
| <i>SMARCC2</i> | Component of the SWI/SNF chromatin remodeling complex |
| <i>RAI1</i>    | Circadian clock transcriptional regulator             |
| <i>ITGAX</i>   | Receptor for fibrinogen                               |
| <i>RAC1</i>    | Small GTPase associated with the plasma membrane      |
| <i>SEC13</i>   | Component of the Nuclear Pore Complex                 |
| <i>SHPRH</i>   | E3 Ubiquitin Ligase                                   |
| <i>AHCTF1</i>  | Factor required for Nuclear Pore Assembly             |
| <i>FZR1</i>    | Component of the Anaphase Promoting Complex/Cyclosome |
| <i>ATXN7L3</i> | Component of SAGA (histone acetyltransferase complex) |
| <i>CMTM5</i>   | Transmembrane domain containing protein               |
| <i>HAT1</i>    | Lysine Acetyltransferase                              |
| <i>NCAPD2</i>  | Component of the Condensin Complex                    |
| <i>TADA3</i>   | Component of the PCAF complex                         |
| <i>SUPT16H</i> | Component of the FACT complex                         |
| <i>WDR61</i>   | Component of the PAF1 complex                         |
| <i>BMI1</i>    | Component of the PRC-1 like complex                   |
| <i>SUN3</i>    | Component of the LINC complex                         |
| <i>CREBBP</i>  | Lysine Acetyltransferase                              |
| <i>UBE2E1</i>  | E2 ubiquitin conjugating enzyme                       |
